# Supplementary material for: Circulatory Inflammatory Mediators in the Prediction of Anti-Tuberculous Drug-Induced Liver Injury Using RUCAM for Causality Assessment
Source: MDPI journal article supplement (doi:10.3390/biomedicines9080891), 2021-07-25
Supplement: s1 [file s1]

**Table S1.** Receiver operating characteristic (ROC) curve analysis and area under the ROC curve (AUC) of baseline plasma cytokines in prediction of drug-induced liver injury

|          | AUC<br>(mean $\pm$ SD) | <i>p</i> | Cut-off value | Sensitivity | Specificity |
|----------|------------------------|----------|---------------|-------------|-------------|
| FGF-2    | 0.455 $\pm$ 0.065      | 0.515    | -             | -           | -           |
| IL-10    | 0.634 $\pm$ 0.064      | 0.053    | 3.9 pg/mL     | 0.263       | 0.964       |
| IL-17A   | 0.493 $\pm$ 0.071      | 0.923    | 0.99 pg/mL    | 0.316       | 0.738       |
| IL-22    | 0.562 $\pm$ 0.072      | 0.369    | 2.4 pg/mL     | 0.421       | 0.715       |
| IL-22BP  | 0.389 $\pm$ 0.072      | 0.110    | 520 ng/L      | 0.737       | 0.100       |
| IL-23    | 0.527 $\pm$ 0.070      | 0.695    | 2.1 pg/mL     | 0.263       | 0.805       |
| IL-6     | 0.631 $\pm$ 0.068      | 0.058    | 19.0 pg/mL    | 0.421       | 0.791       |
| IP-10    | 0.679 $\pm$ 0.064      | 0.010    | 33.0 pg/mL    | 0.684       | 0.620       |
| MIG      | 0.624 $\pm$ 0.065      | 0.073    | 53.0 pg/mL    | 0.842       | 0.176       |
| MIP-1b   | 0.626 $\pm$ 0.061      | 0.069    | 72.6 pg/mL    | 0.947       | 0.253       |
| PDGF-BB  | 0.526 $\pm$ 0.067      | 0.710    | 0.61 pg/mL    | 0.842       | 0.249       |
| RANTES   | 0.476 $\pm$ 0.068      | 0.729    | 44.8 pg/mL    | 1.000       | 0.032       |
| IL-12p70 | 0.564 $\pm$ 0.072      | 0.356    | 1.45 pg/mL    | 0.368       | 0.801       |
| CD206    | 0.603 $\pm$ 0.056      | 0.138    | 1.147 ng/mL   | 0.842       | 0.452       |
| sCD163   | 0.571 $\pm$ 0.074      | 0.305    | 1.32 ng/mL    | 0.789       | 0.371       |

Abbreviation: AUC, area under the curve; FGF-2, fibroblast growth factor 2; IL, interleukin; IL-22BP, IL-22 binding protein; IP-10, interferon gamma-induced protein 10; MIG, monokine induced by interferon-gamma; MIP-1b, macrophage inflammatory protein-1beta; PDGF-BB, platelet-derived growth factor-BB; RANTES, Regulated upon Activation, Normal T Cell Expressed and Presumably Secreted; sCD163, soluble CD163; SD, standard deviation
